# Supplementary material
Source: HighWire-hosted journal article supplement (https://erj.ersjournals.com/content/58/2/2003393)

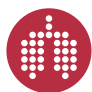

# Understanding the key issues in the treatment of uncontrolled persistent asthma with type 2 inflammation

SHAREABLE PDF

William W. Busse<sup>1</sup>, Monica Kraft<sup>2</sup>, Klaus F. Rabe<sup>3,4</sup>, Yamo Deniz<sup>5</sup>, Paul J. Rowe<sup>6</sup>, Marcella Ruddy<sup>5</sup> and Mario Castro<sup>7</sup>

<sup>1</sup>UW Allergy, Pulmonary and Critical Care Medicine, University of Wisconsin School of Medicine and Public Health, Madison, WI, USA.

<sup>2</sup>University of Arizona Health Sciences Center, Tucson, AZ, USA. <sup>3</sup>LungenClinic Grosshansdorf (member of the German Center for Lung Research, DZL), Airway Research Center North (ARCN), Grosshansdorf, Germany. <sup>4</sup>Christian-Albrechts University (member of the German Center for Lung Research, DZL), Airway Research Center North (ARCN), Kiel, Germany. <sup>5</sup>Regeneron Pharmaceuticals, Inc., Tarrytown, NY, USA. <sup>6</sup>Sanofi, Bridgewater, NJ, USA. <sup>7</sup>University of Kansas School of Medicine, Kansas City, KS, USA.

Corresponding author: William W. Busse ([wwb@medicine.wisc.edu](mailto:wwb@medicine.wisc.edu))

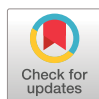

Shareable abstract (@ERSpublications)

**This review covers the pathophysiology of type 2 inflammation in asthma, its influence on type 2 comorbidities, and ways in which type 2 biomarkers can be harnessed to improve diagnosis and further personalise treatments in the age of biologic medicines** <https://bit.ly/2MSOI20>

**Cite this article as:** Busse WW, Kraft M, Rabe KF, *et al.* Understanding the key issues in the treatment of uncontrolled persistent asthma with type 2 inflammation. *Eur Respir J* 2021; 58: 2003393 [DOI: 10.1183/13993003.03393-2020].

This single-page version can be shared freely online.

Copyright ©The authors 2021.

This version is distributed under the terms of the Creative Commons Attribution Non-Commercial Licence 4.0. For commercial reproduction rights and permissions contact [permissions@ersnet.org](mailto:permissions@ersnet.org)

Received: 4 Sept 2020  
Accepted: 21 Dec 2020

## Abstract

Asthma is a complex respiratory disease that varies in severity and response to treatment. Several asthma phenotypes with unique clinical and inflammatory characteristics have been identified. Endotypes, based on distinct molecular profiles, help to further elucidate the heterogeneity within asthma. Type 2 inflammation, involving both the innate (type 2 innate lymphoid cell) and adaptive (T-helper type 2 cells) immune systems, underpins the complex pathophysiology of chronic inflammation in asthma, as well as the presence of comorbid disease (*e.g.* chronic rhinosinusitis with nasal polyps, allergic rhinitis and atopic dermatitis). Type 2 inflammation is characterised by upregulation of the type 2 cytokines interleukin (IL)-4, IL-5 and IL-13, IgE-mediated release of immune mediators and dysfunction of epithelial or epidermal barriers. Targeting these key proximal type 2 cytokines has shown efficacy in recent studies adopting a personalised approach to treatment using targeted biologics. Elevated levels of biomarkers downstream of type 2 cytokines, including fractional exhaled nitric oxide, serum IgE and blood and sputum eosinophils, have been linked to mechanisms involved in type 2 inflammation. They have the potential to aid diagnosis, and to predict and monitor response to treatment. The objective of this review is to summarise the current understanding of the biology of type 2 inflammation in asthma, examine its influence on type 2 inflammatory comorbidities, and discuss how type 2 inflammatory biomarkers can be harnessed to further personalise treatments in the age of biologic medicines.

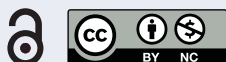

Supplement: inline-supplementary-material-1 [file inline-supplementary-material-1.pdf]
